# Supplementary material for: An early bothremydid (Testudines, Pleurodira) from the Late Cretaceous (Cenomanian) of Utah, North America
Source: PeerJ journal article supplement (doi:10.7717/peerj.2502), 2016-09-28

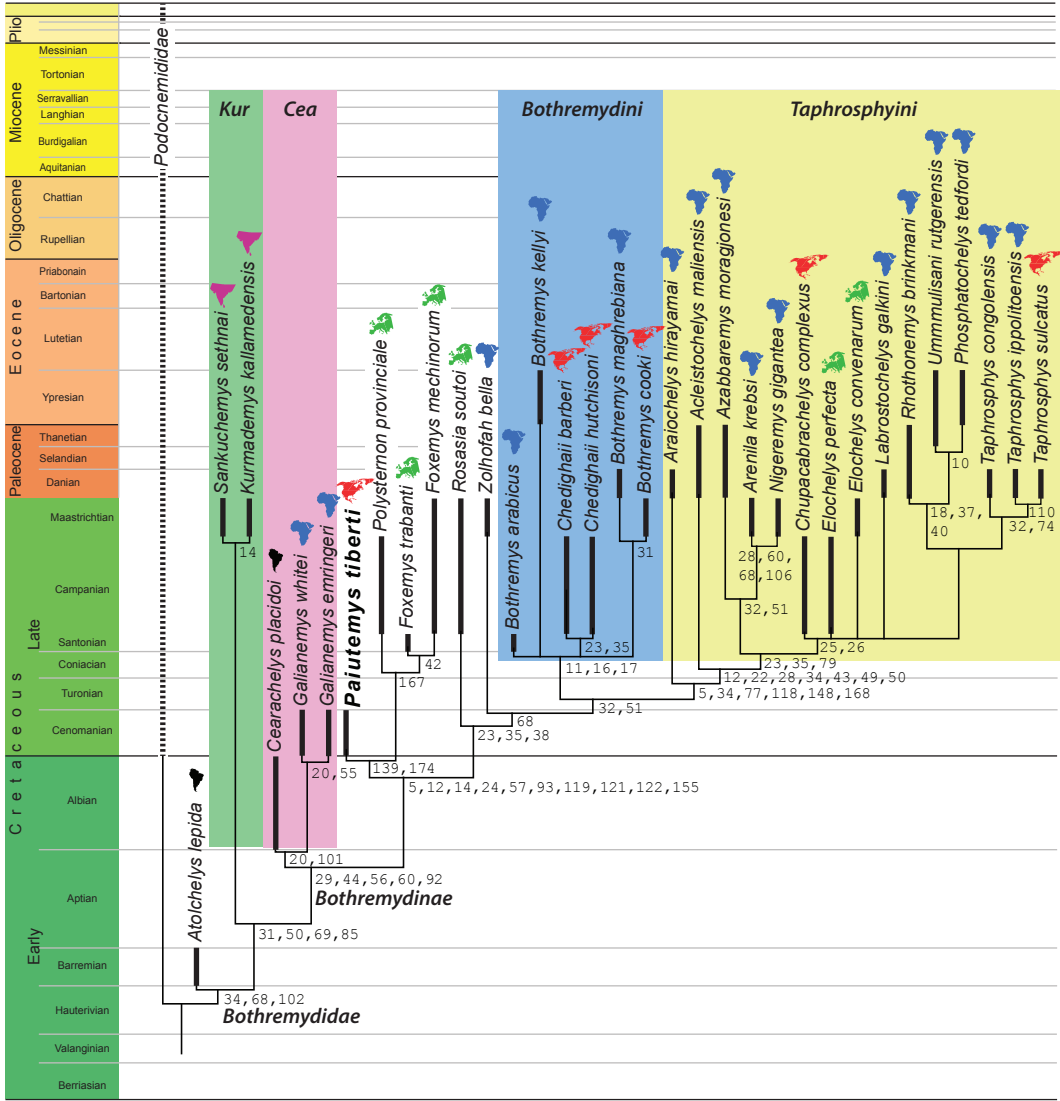

Supplement: Supplementary_File_3R.pdf [file Supplementary_File_3R.pdf]
